# Supplementary material for: The Role of Probiotics in Managing Glucose Homeostasis in Adults with Prediabetes: A Systematic Review and Meta‐Analysis
Source: Hindawi journal article supplement (doi:10.1155/2024/5996218), 2024-01-01
Supplement: f3 [file 5996218.f3.pdf]

## Supplementary Figures

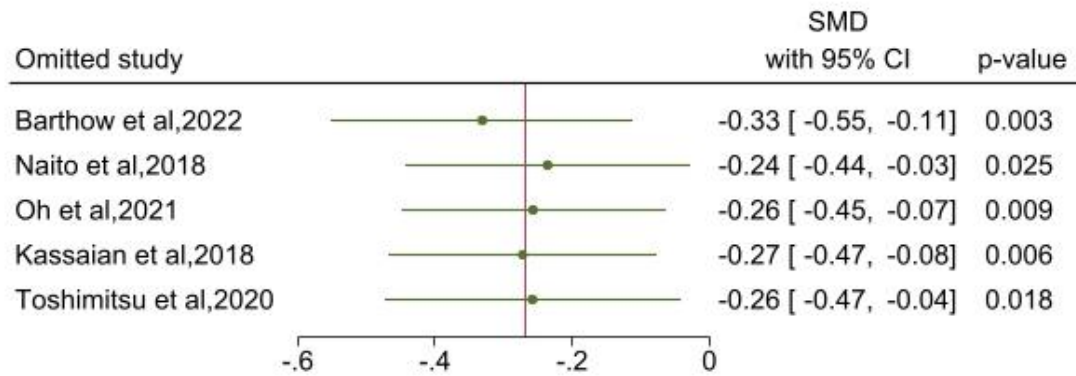

Random-effects REML model

**Figure S1** Sensitivity analysis for HOMA-IR

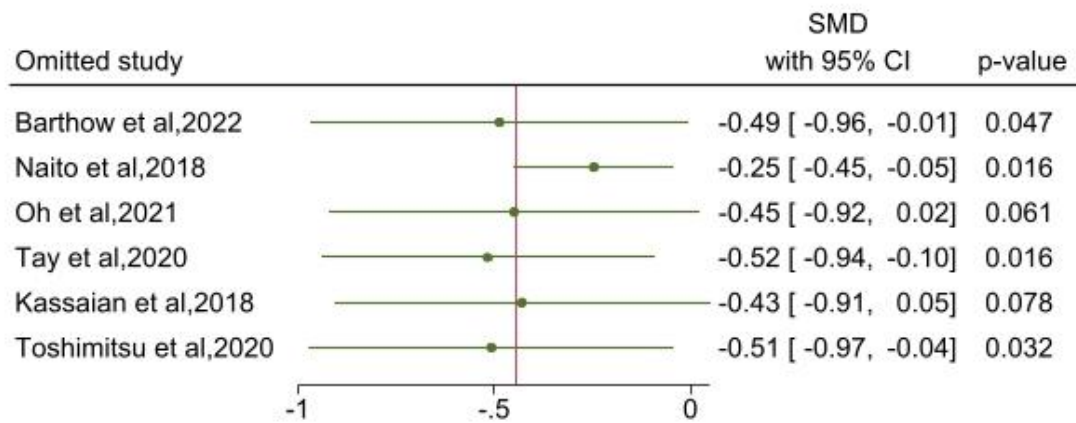

Random-effects REML model

**Figure S2** Sensitivity analysis for HbA1c

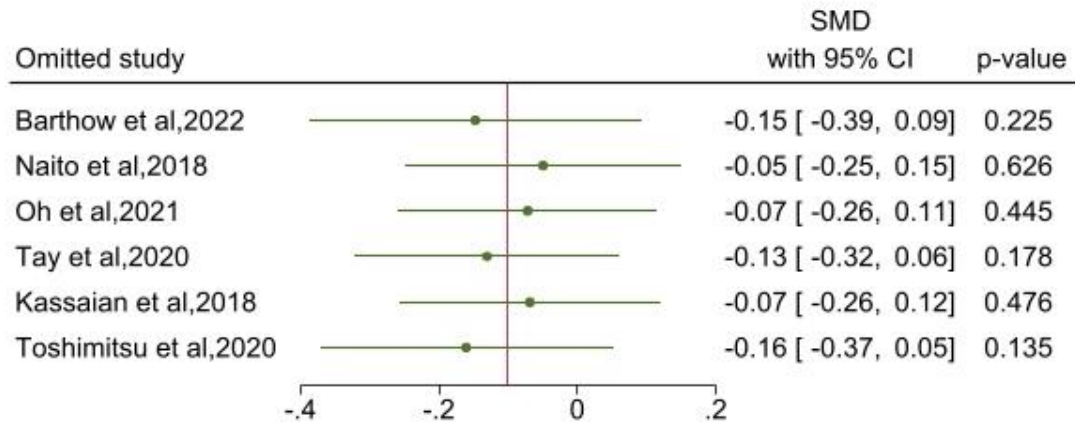

Random-effects REML model

**Figure S3** Sensitivity analysis for FBG

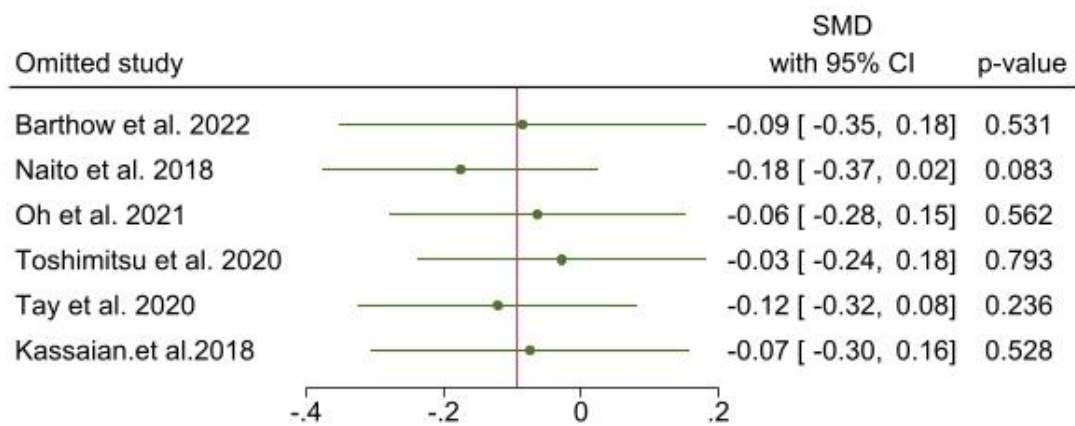

Random-effects REML model

**Figure S4** Sensitivity analysis for insulin

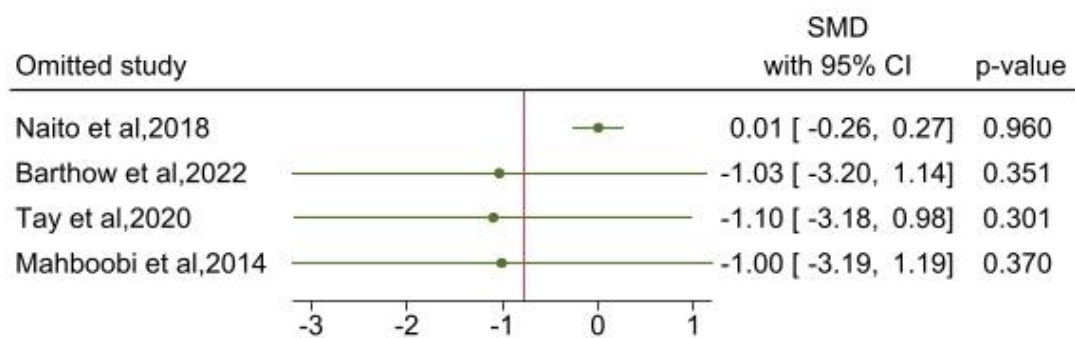

Random-effects REML model

**Figure S5** Sensitivity analysis for TC

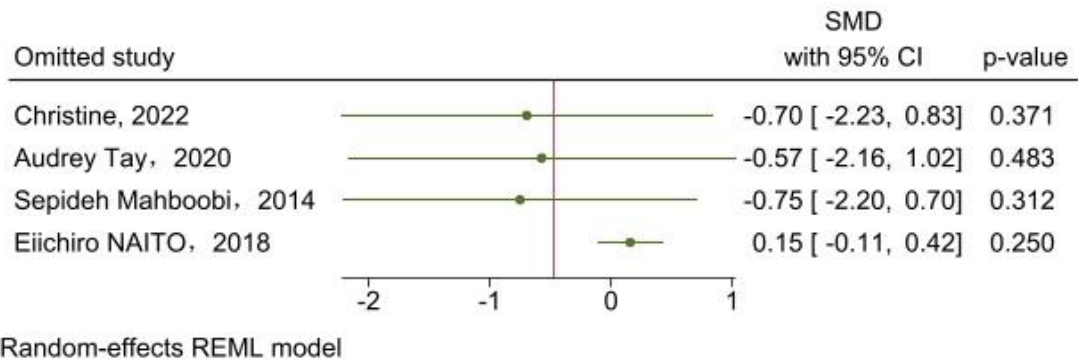

**Figure S6** Sensitivity analysis for TG

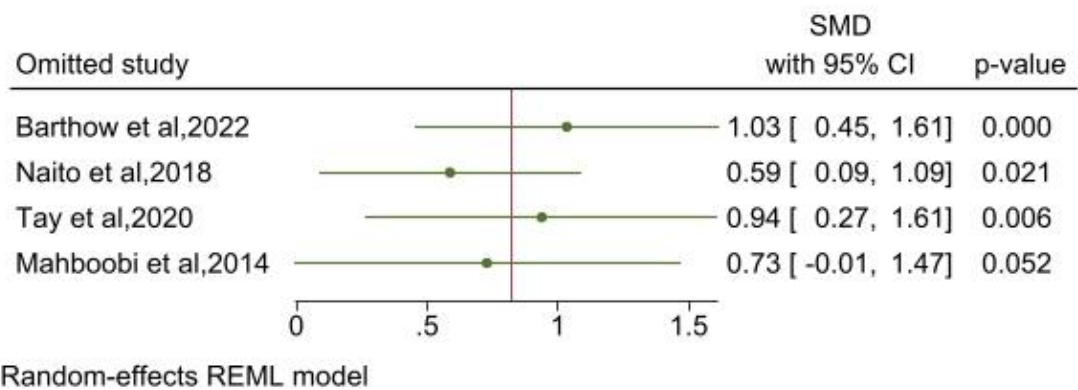

**Figure S7** Sensitivity analysis for HDL

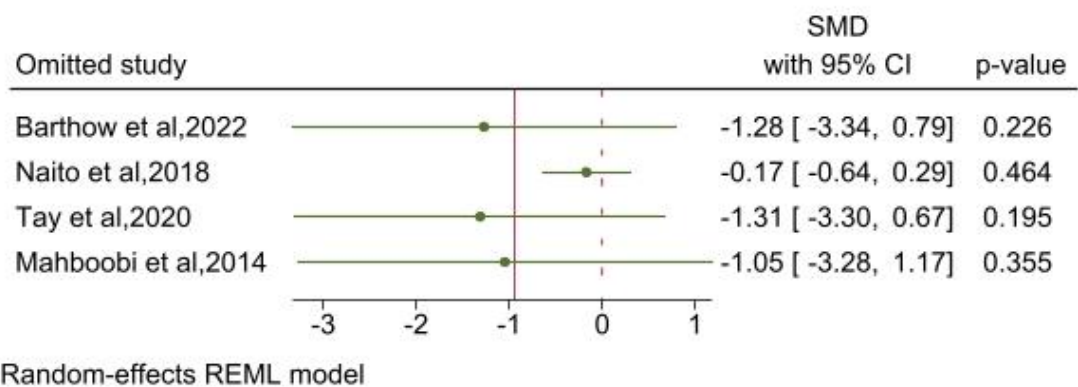

**Figure S8** Sensitivity analysis for LDL

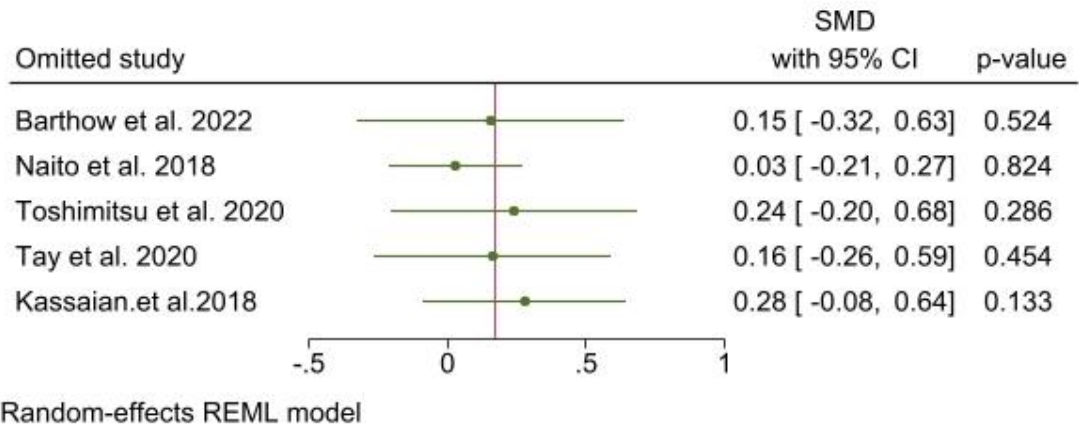

**Figure S9** Sensitivity analysis for BMI
